# Supplementary material for: Evidence Synthesis of Gene Therapy and Gene Editing from Different Disorders—Implications for Individuals with Rett Syndrome: A Systematic Review
Source: MDPI journal article supplement (doi:10.3390/ijms24109023), 2023-05-19
Supplement: s1 [file s1]

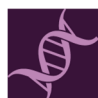

**Supplementary Table S1:** Summary of records using the secondary search terms

| Search Terms                                                                          | Databases Searched |          |        |          |        |                |
|---------------------------------------------------------------------------------------|--------------------|----------|--------|----------|--------|----------------|
|                                                                                       | PubMed             | Cochrane | Scopus | PsycINFO | Embase | Web of Science |
| (Angelman Syndrome) AND (gene therapy *) AND (Brain *)                                | 37                 | 1        | 37     | 1        | 11     | 34             |
| (MECP2 duplication syndrome OR MDS) AND (gene therapy *) AND (Brain *)                | 34                 | 6        | 19     | 0        | 8      | 35             |
| (Tuberous sclerosis OR tuberous sclerosis complex) AND (gene therapy *) AND (Brain *) | 98                 | 2        | 116    | 0        | 19     | 71             |
| Number of article(s) identified                                                       | 1                  | 0        | 0      | 0        | 0      | 0              |

\* Truncation symbol used in the searches ensured that all the different forms of the word were searched.
